# Supplementary material for: Synthetic analogues of marine alkaloid clathrodin differently induce phosphatidylserine exposure in monocytic cancer cells then in cancer stem cell lines
Source: Royal Society of Chemistry journal article supplement (doi:10.1039/c6md00163g), 2016-01-01
Supplement: c6md00163g1.pdf [file c6md00163g1.pdf]

# NT2/D1

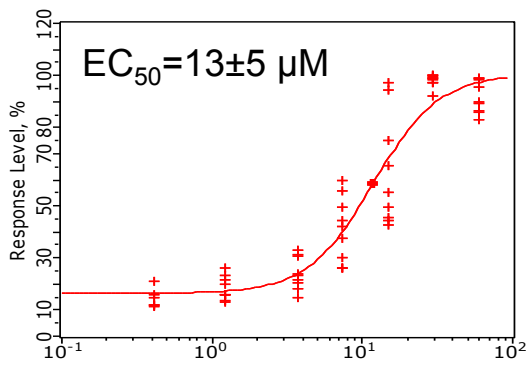

[compound 2] μM

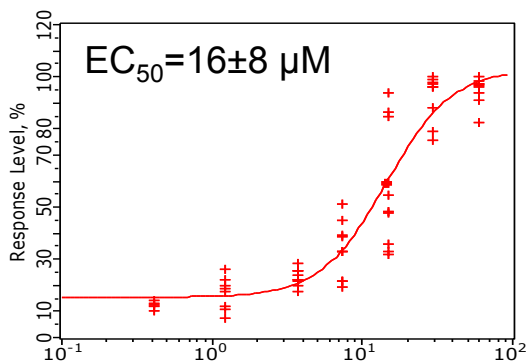

[compound 3] μM

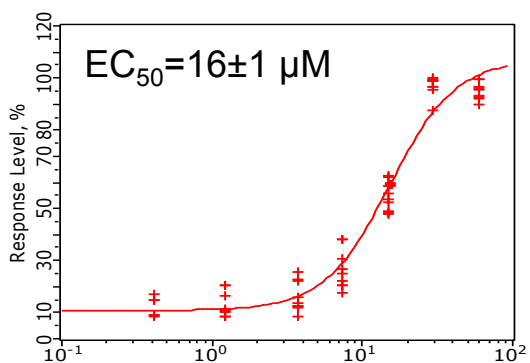

[compound 4] μM

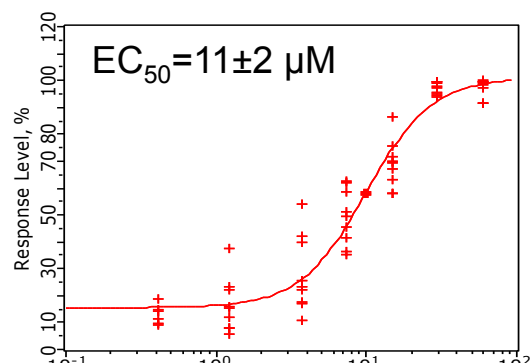

[compound 5] μM

# THP-1

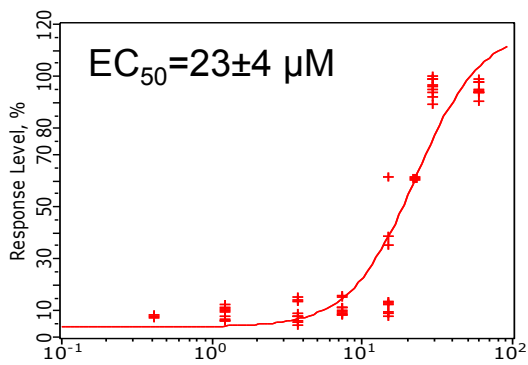

[compound 2] μM

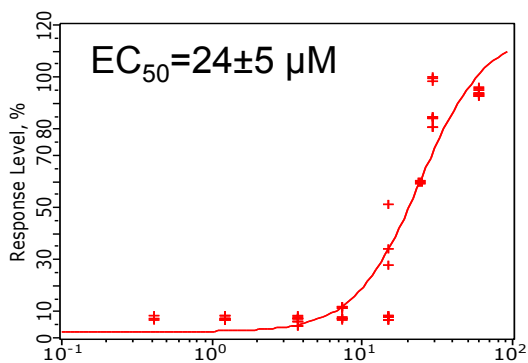

[compound 3] μM

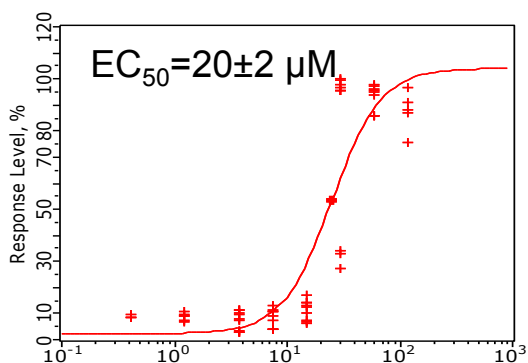

[compound 4] μM

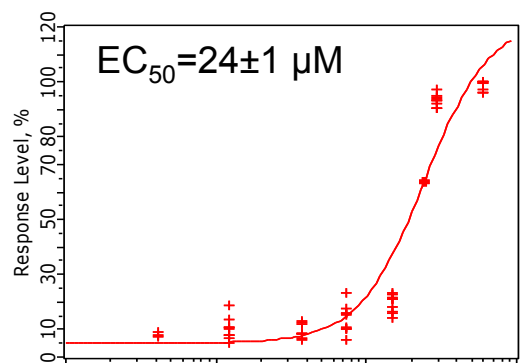

[compound 5] μM
